# Supplementary material
Source: PubMed Central journal article supplement (PMC5077166)
Supplement: NIHMS803417-supplement-2.pdf [file NIHMS803417-supplement-2.pdf]

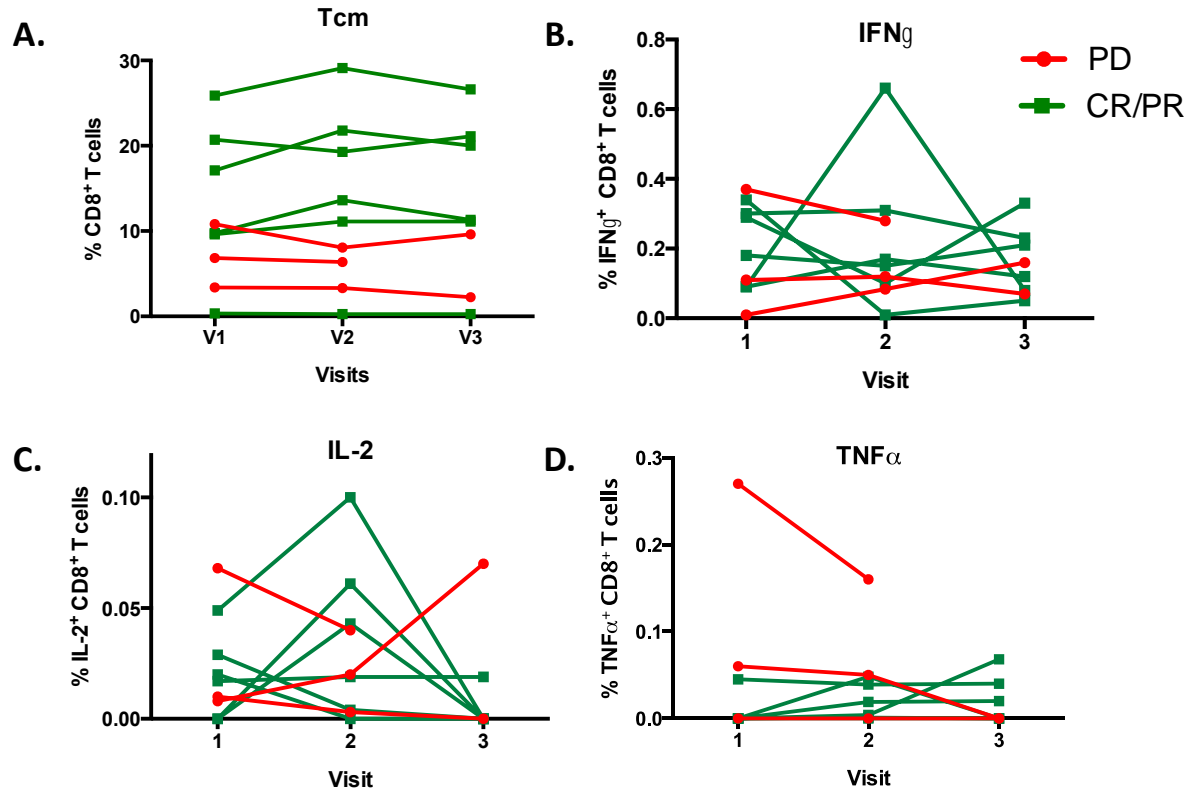

**Supplementary Figure S1** Conventional flow cytometric analyses of PBMC from melanoma patients treated with radiation and ipilimumab (A) PBMC from melanoma patients receiving ipilimumab were collected and cryopreserved at baseline pre-treatment (visit 1), 2<sup>nd</sup> ipilimumab dose (visit 2) and 4<sup>th</sup> ipilimumab dose (visit 3). The frequency of CCR7+CD45RA- CD8+ T cells (central memory, Tcm) is shown in (A). (B-D) PBMC from (A) were stimulated *ex vivo* with a melanoma peptide mix containing MART-1, gp100 and NY-ESO-1 for 6 hours and (B) IFN $\gamma$ , (C) IL-2 and (D) TNF $\alpha$  producing CD8+ T cells were identified using intracellular cytokine staining and flow cytometry. PD=Progressive Disease, CR/PR=Complete Response/Partial Response.

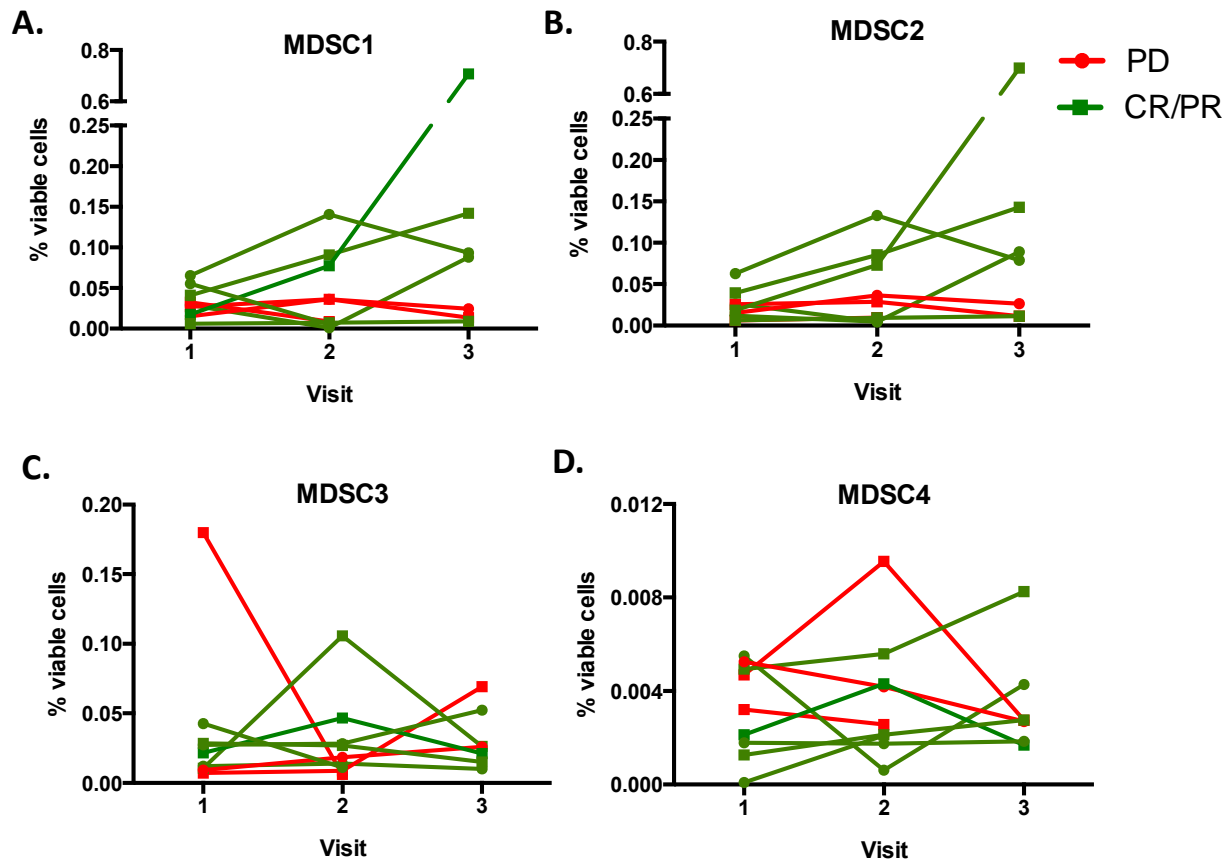

**Supplementary Figure S2** Myeloid Derived Suppressor Cells (MDSC) phenotyping by conventional flow cytometric analyses of whole blood from melanoma patients treated with radiation and ipilimumab. Samples were collected from patients at baseline pre-treatment (visit 1), 2<sup>nd</sup> ipilimumab dose (visit 2) and 4<sup>th</sup> ipilimumab dose (visit 3). These samples were stained using the antibody panel detailed in the methods section. Cells were analyzed by flow cytometry and the frequency of MDSC 1-4 (A-D) was determined using the gating strategy described by Walter et al. PD=Progressive Disease, CR/PR=Complete Response/Partial Response.
